# Supplementary material
Source: HighWire-hosted journal article supplement (https://bmjopen.bmj.com/content/13/12/e064335)
Supplement: inline-supplementary-material-1 [file inline-supplementary-material-1.pdf]

## Appendix 1. Systematic Review Methods

### *The Netherlands*

PubMed and Embase were searched using the search terms shown in Appendix 3, resulting in 242 and 136 articles respectively. The removing of duplicates in Endnote and Rayyan resulted in a final set of 296 articles for title/abstract screening. In this stage, articles were included that reported Dutch studies on UTI or bacteraemia, that potentially contained data for both susceptible and resistant UTIs, but had not necessarily reported these data or did not mention the specific pathogen. In the case where, for example, testing for resistance had been mentioned but specific data were not separately reported for AMR and AMS *E. coli*, the authors were emailed. After full-text screening of 43 articles, a total of 18 were retained, and the authors were requested more data. If there was no response after a month, a follow-up email was sent.

We excluded case studies and studies that were carried out in a specific vulnerable population (elderly persons, children), or in highly-specific clinical patient populations. Inclusion criteria applied to the final set of articles were : a Dutch study, published in 2017 or later, UTI caused by resistant and/or susceptible *E. coli*, and estimates for one or more of parameters needed for the OTs. Following this systematic literature search, further relevant articles were possibly identified during correspondence with authors.

Given the almost null yield of the first search, a second literature search was undertaken to locate relevant studies specifically informing the model parameters involving bacteraemia (i.e.,  $P(\text{Bact}|\text{UTI})$ ,  $DD(\text{Bact})$ ,  $P(\text{Death}|\text{Bact})$ ) (Appendix 3). This produced 24 hits, due to the limited number of hits, we performed full-text screening for all. Inclusion criteria were only that the study reported suitable data on cases of bacteraemia in which *E. coli* had been isolated.

Following this search, further relevant articles were possibly identified in correspondence with authors of retained articles. We then applied the following algorithm to the set of identified articles: (i) if no eligible Dutch population studies were found reporting parameter values involving bacteraemia due to susceptible/resistant *E. coli* UTI, then (ii) Dutch studies reporting parameter values involving bacteraemia with susceptible/resistant *E. coli* from any infection site were used. (iii) If still no eligible studies found, then EU studies reporting parameter values due to bacteraemia with AMR/AMS *E. coli* from any infection site were considered eligible.

A third systematic literature search was conducted to attempt to find relevant studies specifically to inform  $P(\text{Bact}|\text{UTI})$ , with restriction to studies of resistant *E. coli* UTIs (Appendix 1). This produced 13 hits; 10 articles were eliminated based on abstract screening and the remaining three after full-text screening. A PRISMA diagram for all three searches together is shown in Figure S1.

### *Italy*

PubMed and Embase were searched using the search term in Appendix 4, and yielded 231 and 176 results respectively. After removing duplicates in EndNote and Rayan, 290 articles remained. After title/abstract screening 56 articles were screened full text and 32 articles potentially contained parameter estimates relevant for the Italian population.

Given the almost null yield of the first search, we performed new separate searches for the incidence, progression from UTI to bacteraemia, DD(UTI) and LOS due to bacteraemia. For LOS(UTI) a third search was conducted (Appendix 4). Eventually, three articles from the search and one article recommended to the authors which fell outside the initial search criteria

of articles published from 2017 or later were used to estimate the parameters. A PRISMA diagram for all searches on Italian parameters together is shown in Figure S2.

## Appendix 2 – Systematic review to identify Dutch parameter estimates

### Search 1

4th of February 2019

**PubMed:** (("2017/01/01"[Date - Publication] : "3000"[Date - Publication])) AND ((((((urinary[Title/Abstract] AND tract[Title/Abstract]) AND (infection[Title/Abstract] OR infections[Title/Abstract])) OR urinary tract infection[MeSH] OR UTI[Title/Abstract]) AND (Netherlands OR Netherlands[MeSH] OR Dutch) AND (english[Language] OR dutch[Language])) AND ( "2017/01/01"[PDat] : "3000/12/31"[PDat] ))

**242 results**

4th of February 2019

**Embase:** ('urinary':ab,ti AND 'tract':ab,ti AND ('infection':ab,ti OR 'infections':ab,ti) OR 'uti':ab,ti) AND ('netherlands' OR 'dutch') AND [article]/lim AND ([dutch]/lim OR [english]/lim) AND [humans]/lim AND [embase]/lim AND [2017-2019]/py

**136 results**

### Search 2

10<sup>th</sup> of February, 2020

**PubMed:** ((*bacteraemia*[Title/Abstract] OR *bacteremia*[Title/Abstract])) AND ((*Netherlands*[Text Word]) AND *Dutch*[Text Word]).

**24 results**

13<sup>th</sup> of February, 2020

**PubMed:**((((urinary tract[Title/Abstract]) AND infection[Title/Abstract])) OR

UTI[Title/Abstract]) AND ((Netherlands[Text Word] OR Dutch [Text Word])) AND ((length of stay[Text Word] OR LOS[Text Word])

### 3 results

Search 3 –

13<sup>th</sup> of February, 2020

**PubMed:** (((bacteraemia[Text Word] OR (bacteremia[Text Word])) AND resist\*[Text Word] AND (E coli[MeSH] OR E coli[Text Word]) AND ((urinary tract infection[MeSH]) OR (UTI[Text Word])) AND (("probability of"[Text Word]) OR (progress\*[Text Word]) OR ("risk of "[Text Word]) )).

### 13 results

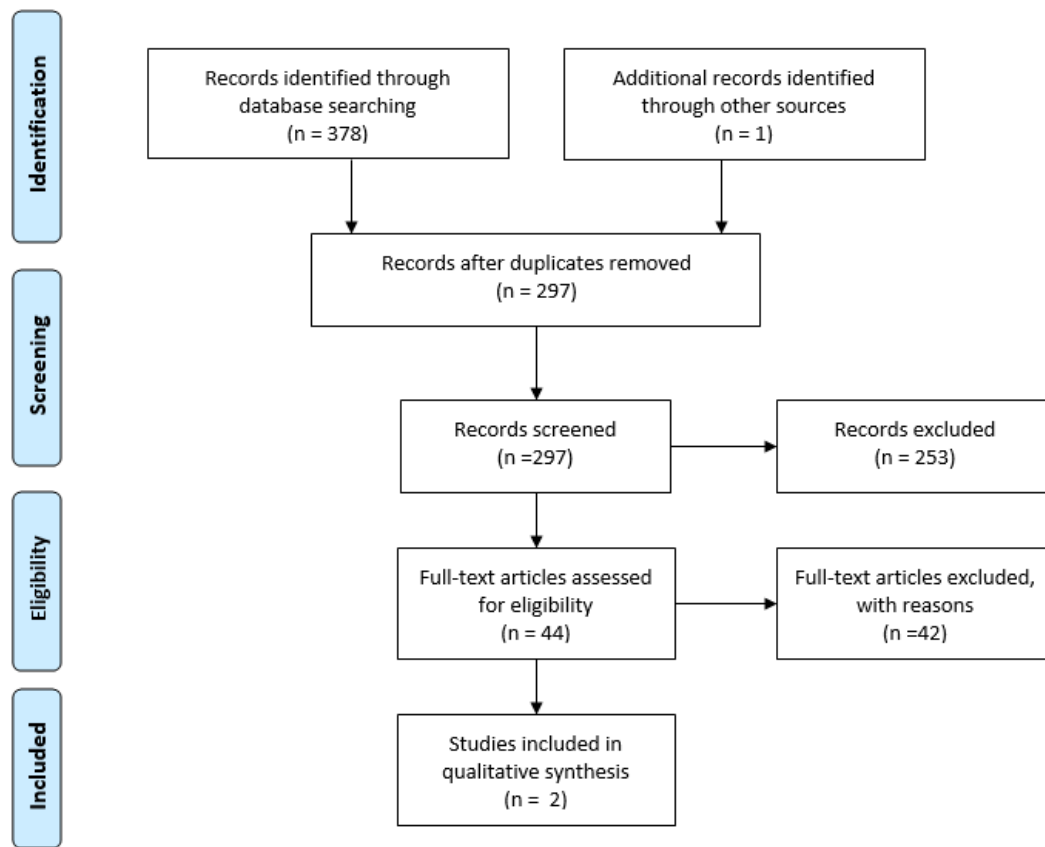

Figure S1

PRISMA flowchart of the first literature search on Dutch parameter estimates

### Appendix 3 – Systematic review to identify Italian parameter estimates

Search 1

4th of February, 2019

**Pubmed:** (((("2017/01/01"[Date - Publication] : "3000"[Date - Publication])) AND ((((((urinary[Title/Abstract] AND tract[Title/Abstract]) AND (infection[Title/Abstract] OR infections[Title/Abstract])) OR urinary tract infection[MeSH] OR UTI[Title/Abstract]) AND (Italy OR Italy[MeSH] OR Italian) AND (english[Language] OR dutch[Language])) AND ("2017/01/01"[PDat] : "3000/12/31"[PDat] )))

**231 results**

('urinary':ab,ti AND 'tract':ab,ti AND ('infection':ab,ti OR 'infections':ab,ti) OR 'uti':ab,ti) AND ('italy' OR 'italian') AND [article]/lim AND ([dutch]/lim OR [english]/lim) AND [humans]/lim AND [embase]/lim AND [2017-2019]/py

**176 results**

Search 2

3th of June, 2020

**Incidence - PubMed:** ("2019/01/01"[Date - Publication] : "3000"[Date - Publication]) AND Italy AND ((urinary[Title/Abstract] AND tract [Title/Abstract] AND infection [Title/Abstract]) OR UTI [Title/Abstract]) AND incidence.

**35 results**

3th of June, 2020

**LOS UTI - PubMed** ("2019/01/01"[Date - Publication] : "3000"[Date - Publication]) AND Italy AND ((urinary[Title/Abstract] AND tract [Title/Abstract] AND infection [Title/Abstract]) OR

UTI [Title/Abstract] AND (LOS [Title/Abstract] OR (length [Title/Abstract] AND stay [Title/Abstract])).

### 5 results

18<sup>th</sup> of June, 2020

**UTI to bacteraemia – PubMed:** (("2019/01/01"[Date - Publication] : "2020/06/18"[Date - Publication])) AND ((Italy[Text Word]) AND ((UTI[Title/Abstract] OR (((urinary[Title/Abstract] AND (tract[Title/Abstract])) AND (infection[Title/Abstract])))).

### 21 results

31<sup>st</sup> of August, 2020

**LOS Bacteraemia – PubMed:** (("2005/01/01"[Date - Publication] : "3000"[Date - Publication])) AND ((Italy[Text Word]) AND (((bacteraemia[Title/Abstract] OR (bacteraemias[Title/Abstract])) OR (bacteremia[Title/Abstract])) OR (bacteremias[Title/Abstract])) AND (((days[Title/Abstract] OR ((length[Title/Abstract] AND (of[Title/Abstract])) AND (stay[Title/Abstract])))) OR (LOS[Title/Abstract]))))

### 24 results

Search 3

16<sup>th</sup> of June, 2020

**LOS UTI– Pubmed** (("2015/01/01"[Date - Publication] : "3000"[Date - Publication]) AND Italy AND ((urinary[Title/Abstract] AND tract [Title/Abstract] AND infection [Title/Abstract]) OR UTI [Title/Abstract] AND (LOS [Title/Abstract] OR disability duration [Title/Abstract] OR (length [Title/Abstract] AND stay [Title/Abstract]))) NOT (("2019/01/01"[Date - Publication] : "2020/06/02"[Date - Publication]) AND Italy AND ((urinary[Title/Abstract] AND tract [Title/Abstract] AND infection [Title/Abstract]) OR UTI [Title/Abstract] AND (LOS



[Title/Abstract] OR (length [Title/Abstract] AND stay [Title/Abstract]))).

## 7 results

2<sup>nd</sup> of September, 2020

((general practitioner) OR (general practice)) AND (((urinary tract infection) OR (UTI))

AND (Italy))) AND ((out-patient) OR (outpatient))

## 10 results, 1 included

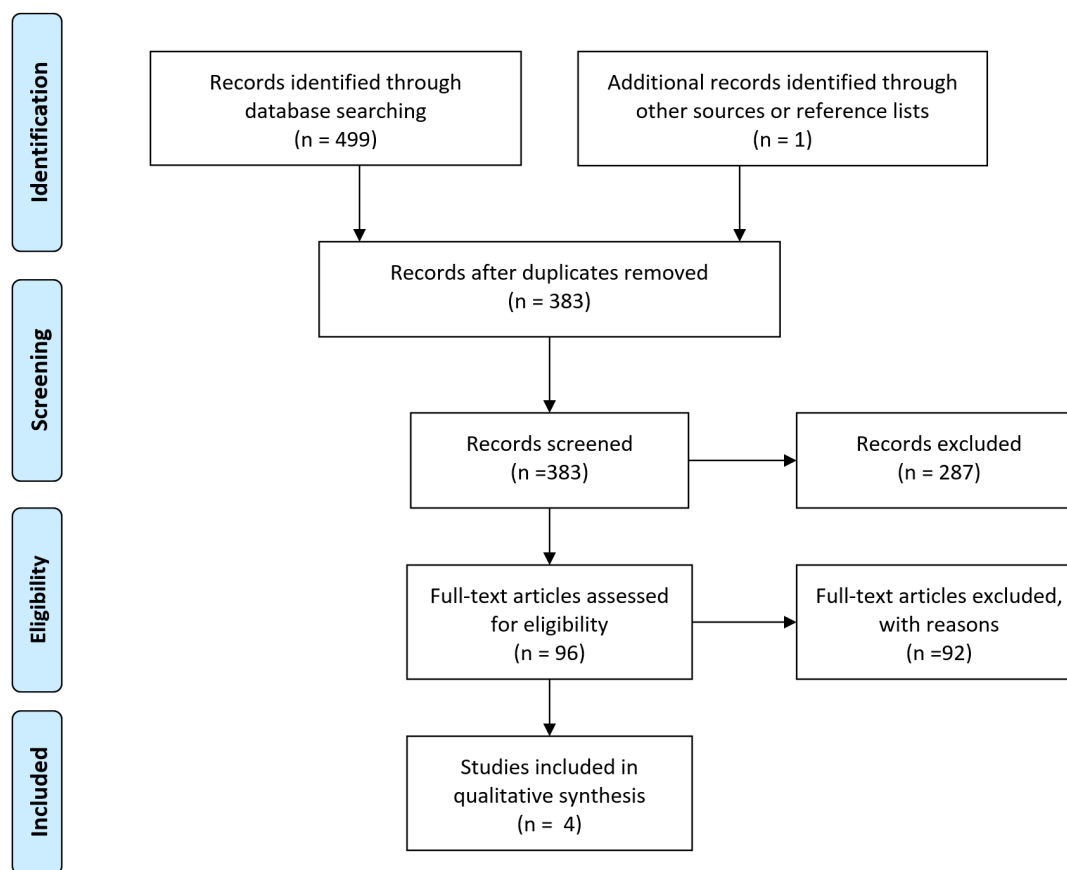

Figure S2

PRISMA flowchart of the literature search on Italian parameter estimates

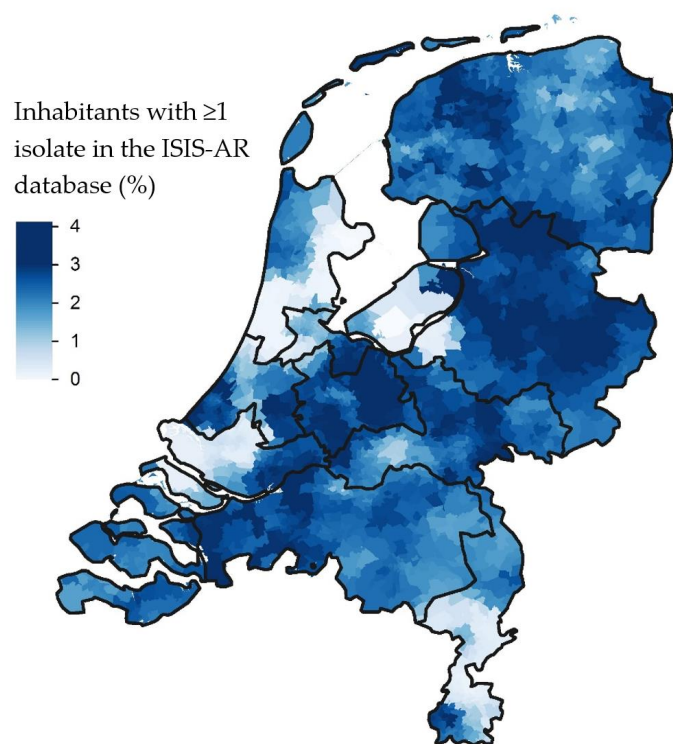

**Figure S3**

smoothed geographical distribution of the percentage of inhabitants for whom at least 1 urinary isolate was found in the ISIS-AR database in 2018, by 4-digit postal code area and with regional cooperative network borders

## Appendix 4.

### *Systematic review results*

#### *The Netherlands*

The first systematic literature review yielded only two articles, both providing an estimate of DD(UTI). In the first study the Netherlands was one of four countries on which analysis was based, and bacteria species and AMS vs. AMR infections were not distinguished. Correspondence with the authors yielded a more appropriate citation (1), which was carried out in England and Wales in 2002-2004 and reported DD(UTI) for *E. coli* UTIs separately for AMS and AMR infection. (In Figure S1 this article is indicated as an additional record identified through other sources). We justified this choice as the analysis in (2) did not find any between-country difference in DD(UTI).

The second review resulted in one suitable study for  $P(\text{Death}|\text{Bact})$ , which was a Dutch study that reported 30-day mortality in bacteraemia patients with either resistant *E. coli* or susceptible *E. coli* in 2014–2016 (3). The study population had a median age of 69 years (*IQR* 57 to 77); it is plausible that a lower mortality rate would be observed for younger age-groups. We could only locate a single study reporting age-group specific values for 30-day mortality due to bacteraemia (4). This study was conducted in Iceland among patients with bacteraemia caused by *S. aureus*. We took the simple approach of setting the parameter values for  $P(\text{Death}|\text{Bact})$  for the age-groups 55 years and older to the value from study (3), and then scaling the parameter values for the younger age-groups according to the ratio of 30-day mortality risks between the 'reference' age-group, 55-74 years, and the <35 years and 35-54 years age-groups from the Icelandic study (4). This meant  $P(\text{Death}|\text{Bact})$  was zero for <35

years (since mortality risk was 0% for <35 years (4)), and a scaling factor of 0.54 (from 3.8%/7.1%) was applied to 35-54 years.

For the parameter DD(Bact), the literature reviews did not yield any eligible studies. We decided to adopt values from (5), which is a large well-conducted multi-country study that was carried out in 2007/8, and that reported patient characteristic-adjusted LOS values for both AMS and 3rd generation cephalosporin-resistant *E. coli* bloodstream infections (BSIs). All selected parameter values are provided in Table 1.

As the third systematic literature review, which was specifically aimed at P(Bact|UTI), did not yield any studies. We relied on a previous pooled analysis [24] which we identified through citation search. This study did not distinguish between AMR and AMS infections, and the contributing studies were all carried out in the USA in the 1980s.

### *Italy*

We found one article providing estimates on P(Death|Bact). The study of Palacios-Baena et al. (6) found a 30-day mortality of 26.2% of ESBL blood stream infections (BSI), 34 of the 130 Italian BSI patients died. We calculated the mortality for susceptible BSI using the ratio of susceptible vs. resistant mortality reported in another, less recent, Italian study by Tumbarello et al. (7) and estimated a 30-day mortality of 5.47% for susceptible BSI.

Furthermore, for DD(UTI) and DD(BACT) we only found an Italian study amongst elderly (*Mdn* = 77, *IQR* = 65–83) with UTIs or urosepsis which reported a mean LOS of 10 [7-17] days (8) and a median LOS of 9.5 days for Italian patients with complicated UTIs in Italy (9). Of the UTIs 58% was caused by *E. coli*. Unfortunately, no studies were identified which specified LOS for ESBL *E. coli* and *E. coli* UTIs. Because the lack of better studies on DD(UTI) and

DD(BACT) amongst adults, we used the estimate of Covino et al. (8) in elderly and Vallejo-Torres et al. (9) on complicated UTIs.

Moreover, we searched the citations of Cassini et al. (10) for relevant Italian studies and found that Tumbarello et al. (7) reported LOS for resistant BSI of  $20 \pm 17$  days and  $13 \pm 9$  days for non-AMR BSI.

For  $P(\text{Bact}|\text{UTI})$  we were unable to locate a parameter and, therefore, we used the same value as the Dutch parameter. For the health outcomes following bacteremia, other than death, we used the same values as Cassini et al. (10).

Regarding the incidence of resistant *E. coli*, we did not locate any direct estimates; therefore, we estimated incidence (see Methods).

#### References Appendix 4.

1. Butler CC, Hillier S, Roberts Z, Dunstan F, Howard A, Palmer S. Antibiotic-resistant infections in primary care are symptomatic for longer and increase workload: outcomes for patients with E. coli UTIs. *Br J Gen Pract J R Coll Gen Pract*. 2006 Sep;56(530):686–92.
2. Altorf-van der Kuil W, Schoffelen AF, de Greeff SC, Thijsen SF, Alblas HJ, Notermans DW, et al. National laboratory-based surveillance system for antimicrobial resistance: a successful tool to support the control of antimicrobial resistance in the Netherlands. *Euro Surveill Bull Eur sur les Mal Transm = Eur Commun Dis Bull*. 2017 Nov;22(46).
3. van Hout D, Verschuuren TD, Bruijning-Verhagen PCJ, Bosch T, Schürch AC, Willems RJL, et al. Extended-spectrum beta-lactamase (ESBL)-producing and non-ESBL-producing *Escherichia coli* isolates causing bacteremia in the Netherlands (2014 – 2016) differ in clonal distribution, antimicrobial resistance gene and virulence gene content. *PLoS One* [Internet]. 2020 Jan 14;15(1):e0227604. Available from: <https://doi.org/10.1371/journal.pone.0227604>
4. Asgeirsson H, Gudlaugsson O, Kristinsson KG, Heiddal S, Kristjansson M. *Staphylococcus aureus* bacteraemia in Iceland, 1995-2008: changing incidence and mortality. *Clin Microbiol Infect Off Publ Eur Soc Clin Microbiol Infect Dis*. 2011 Apr;17(4):513–8.
5. de Kraker MEA, Wolkewitz M, Davey PG, Koller W, Berger J, Nagler J, et al. Burden of antimicrobial resistance in European hospitals: excess mortality and length of hospital stay associated with bloodstream infections due to *Escherichia coli* resistant

- to third-generation cephalosporins. *J Antimicrob Chemother.* 2011 Feb;66(2):398–407.
6. Palacios-Baena ZR, Gutiérrez-Gutiérrez B, De Cueto M, Viale P, Venditti M, Hernández-Torres A, et al. Development and validation of the INCREMENT-ESBL predictive score for mortality in patients with bloodstream infections due to extended-spectrum- $\beta$ -lactamase-producing Enterobacteriaceae. *J Antimicrob Chemother.* 2017 Mar;72(3):906–13.
  7. Tumbarello M, Spanu T, Di Bidino R, Marchetti M, Ruggeri M, Trecarichi EM, et al. Costs of bloodstream infections caused by *Escherichia coli* and influence of extended-spectrum-beta-lactamase production and inadequate initial antibiotic therapy. *Antimicrob Agents Chemother* [Internet]. 2010/07/26. 2010 Oct;54(10):4085–91. Available from: <https://pubmed.ncbi.nlm.nih.gov/20660675>
  8. Covino M, Manno A, Merra G, Simeoni B, Piccioni A, Carbone L, et al. Reduced utility of early procalcitonin and blood culture determination in patients with febrile urinary tract infections in the emergency department. *Intern Emerg Med.* 2020 Jan;15(1):119–25.
  9. Vallejo-Torres L, Pujol M, Shaw E, Wiegand I, Vigo JM, Stoddart M, et al. Cost of hospitalised patients due to complicated urinary tract infections: a retrospective observational study in countries with high prevalence of multidrug-resistant Gram-negative bacteria: the COMBACTE-MAGNET, RESCUING study. *BMJ Open* [Internet]. 2018 Apr 1;8(4):e020251. Available from: <http://bmjopen.bmj.com/content/8/4/e020251.abstract>
  10. Cassini A, Högberg LD, Plachouras D, Quattrocchi A, Hoxha A, Simonsen GS, et al.

Attributable deaths and disability-adjusted life-years caused by infections with antibiotic-resistant bacteria in the EU and the European Economic Area in 2015: a population-level modelling analysis. *Lancet Infect Dis* [Internet]. 2019 Jan 1;19(1):56–66. Available from: [https://doi.org/10.1016/S1473-3099\(18\)30605-4](https://doi.org/10.1016/S1473-3099(18)30605-4)



Table S1. Number and incidence of resistant *E. coli* UTI per age- and sex category in the Netherlands in 2018

| Age category | Males            |                                         |                                         |                      |                                 | Females            |                                         |                                         |                      |                                 |
|--------------|------------------|-----------------------------------------|-----------------------------------------|----------------------|---------------------------------|--------------------|-----------------------------------------|-----------------------------------------|----------------------|---------------------------------|
|              | Male inhabitants | Number of resistant <i>E. coli</i> UTIs | Resistant <i>E. coli</i> UTIs incidence | Average              |                                 | Female inhabitants | Number of resistant <i>E. coli</i> UTIs | Resistant <i>E. coli</i> UTIs incidence | Average              |                                 |
|              |                  |                                         |                                         | Recurrent* resistant | resistant                       |                    |                                         |                                         | Recurrent* resistant | resistant                       |
|              |                  |                                         |                                         | <i>E. Coli</i> UTIs  | <i>E. coli</i> UTIs per patient |                    |                                         |                                         | <i>E. coli</i> UTIs  | <i>E. coli</i> UTIs per patient |
| 0            | 87001            | 12                                      | 0.000137929                             | 0                    | 1.00                            | 82565              | 10                                      | 0.000121117                             | 0                    | 1.00                            |
| 1-4          | 358019           | 25                                      | 5.86561E-05                             | 4                    | 1.19                            | 340514             | 117                                     | 0.000323041                             | 7                    | 1.06                            |
| 5-9          | 475503           | 19                                      | 2.10304E-05                             | 9                    | 1.90                            | 452563             | 148                                     | 0.000287253                             | 18                   | 1.14                            |
| 10-14        | 494511           | 11                                      | 1.61776E-05                             | 3                    | 1.38                            | 471948             | 62                                      | 0.000122895                             | 4                    | 1.07                            |
| 15-19        | 536852           | 20                                      | 2.79407E-05                             | 5                    | 1.33                            | 511180             | 60                                      | 0.000105638                             | 6                    | 1.11                            |
| 20-24        | 542817           | 19                                      | 2.76336E-05                             | 4                    | 1.27                            | 525964             | 140                                     | 0.000230054                             | 19                   | 1.16                            |
| 25-29        | 560319           | 36                                      | 5.53256E-05                             | 5                    | 1.16                            | 545838             | 155                                     | 0.000283967                             | 0                    | 1.00                            |
| 30-34        | 530554           | 38                                      | 6.59688E-05                             | 3                    | 1.09                            | 522235             | 136                                     | 0.000250845                             | 5                    | 1.04                            |
| 35-39        | 512925           | 26                                      | 3.70425E-05                             | 7                    | 1.37                            | 512431             | 114                                     | 0.000204906                             | 9                    | 1.09                            |

|       |         |      |             |     |      |         |      |             |      |      |
|-------|---------|------|-------------|-----|------|---------|------|-------------|------|------|
| 40-44 | 516723  | 53   | 6.77346E-05 | 18  | 1.51 | 521589  | 125  | 0.000191722 | 25   | 1.25 |
| 45-49 | 634188  | 92   | 0.000108801 | 23  | 1.33 | 634635  | 198  | 0.000272598 | 25   | 1.14 |
| 50-54 | 644223  | 143  | 0.000176957 | 29  | 1.25 | 635623  | 270  | 0.00035713  | 43   | 1.19 |
| 55-59 | 606130  | 211  | 0.000268919 | 48  | 1.29 | 605380  | 441  | 0.000597972 | 79   | 1.22 |
| 60-64 | 537540  | 287  | 0.000401831 | 71  | 1.33 | 542198  | 445  | 0.000671341 | 81   | 1.22 |
| 65-69 | 495875  | 460  | 0.000703806 | 111 | 1.32 | 503662  | 473  | 0.000770358 | 85   | 1.22 |
| 70-74 | 424486  | 633  | 0.001036548 | 193 | 1.44 | 447439  | 613  | 0.001115236 | 114  | 1.23 |
| 75-79 | 273902  | 621  | 0.001595461 | 184 | 1.42 | 314838  | 689  | 0.001715168 | 149  | 1.28 |
| 80-84 | 172825  | 487  | 0.002065673 | 130 | 1.36 | 235430  | 683  | 0.002229962 | 158  | 1.30 |
| ≥ 85  | 122648  | 495  | 0.003000457 | 127 | 1.35 | 248011  | 1056 | 0.00033063  | 236  | 1.29 |
| Total | 8527041 | 3688 | 0.000432506 | 974 | 1.36 | 8654043 | 5935 | 0.000685807 | 1063 | 1.22 |

*\*Defined as a UTI occurring more than 14 days after another UTI*

Table S2. Number and incidence of *E. coli* UTI per age- and sex category in the Netherlands in 2018

| Age category | Males            |                               |                               |                                 |                                         | Females            |                               |                               |                                 |                                         |
|--------------|------------------|-------------------------------|-------------------------------|---------------------------------|-----------------------------------------|--------------------|-------------------------------|-------------------------------|---------------------------------|-----------------------------------------|
|              | Male inhabitants | Number of <i>E. coli</i> UTIs | <i>E. coli</i> UTIs incidence | Recurrent * <i>E. Coli</i> UTIs | Average <i>E. coli</i> UTIs per patient | Female inhabitants | Number of <i>E. coli</i> UTIs | <i>E. coli</i> UTIs incidence | Recurrent * <i>E. coli</i> UTIs | Average <i>E. coli</i> UTIs per patient |
| 0            | 87001            | 453                           | 0.0052                        | 0                               | 1.00                                    | 82565              | 413                           | 0.0044                        | 52                              | 1.14                                    |
| 1-4          | 358019           | 598                           | 0.0015                        | 74                              | 1.14                                    | 340514             | 4079                          | 0.0105                        | 518                             | 1.15                                    |
| 5-9          | 475503           | 351                           | 0.0006                        | 45                              | 1.15                                    | 452563             | 6336                          | 0.0115                        | 1111                            | 1.21                                    |
| 10-14        | 494511           | 260                           | 0.0005                        | 34                              | 1.15                                    | 471948             | 2766                          | 0.0049                        | 473                             | 1.21                                    |
| 15-19        | 536852           | 315                           | 0.0005                        | 41                              | 1.15                                    | 511180             | 2651                          | 0.0047                        | 260                             | 1.11                                    |
| 20-24        | 542817           | 318                           | 0.0005                        | 30                              | 1.10                                    | 525964             | 3499                          | 0.0061                        | 316                             | 1.10                                    |
| 25-29        | 560319           | 492                           | 0.0008                        | 60                              | 1.14                                    | 545838             | 3745                          | 0.0069                        | 0                               | 1.00                                    |
| 30-34        | 530554           | 500                           | 0.0009                        | 25                              | 1.05                                    | 522235             | 3714                          | 0.0069                        | 102                             | 1.03                                    |
| 35-39        | 512925           | 731                           | 0.0012                        | 106                             | 1.17                                    | 512431             | 3638                          | 0.0063                        | 432                             | 1.13                                    |
| 40-44        | 516723           | 968                           | 0.0016                        | 147                             | 1.18                                    | 521589             | 3608                          | 0.0060                        | 497                             | 1.16                                    |

|              |                |              |               |             |             |                |               |               |              |             |
|--------------|----------------|--------------|---------------|-------------|-------------|----------------|---------------|---------------|--------------|-------------|
| 45-49        | 634188         | 1630         | 0.0022        | 242         | 1.17        | 634635         | 5053          | 0.0068        | 742          | 1.17        |
| 50-54        | 644223         | 2224         | 0.0029        | 331         | 1.17        | 635623         | 6648          | 0.0089        | 1022         | 1.18        |
| 55-59        | 606130         | 3154         | 0.0044        | 498         | 1.19        | 605380         | 8686          | 0.0120        | 1418         | 1.20        |
| 60-64        | 537540         | 4166         | 0.0065        | 672         | 1.19        | 542198         | 10635         | 0.0161        | 1880         | 1.21        |
| 65-69        | 495875         | 6022         | 0.0099        | 1113        | 1.23        | 503662         | 12863         | 0.0210        | 2296         | 1.22        |
| 70-74        | 424486         | 7930         | 0.0149        | 1598        | 1.25        | 447439         | 16474         | 0.0297        | 3201         | 1.24        |
| 75-79        | 273902         | 7017         | 0.0203        | 1465        | 1.26        | 314838         | 15964         | 0.0407        | 3162         | 1.25        |
| 80-84        | 172825         | 6148         | 0.0280        | 1312        | 1.27        | 235430         | 16251         | 0.0548        | 3340         | 1.26        |
| ≥ 85         | 122648         | 6251         | 0.0411        | 1213        | 1.24        | 248011         | 22890         | 0.0747        | 4355         | 1.23        |
| <b>Total</b> | <b>8527041</b> | <b>49528</b> | <b>0.0058</b> | <b>9006</b> | <b>1.22</b> | <b>8654043</b> | <b>149913</b> | <b>0.0173</b> | <b>25177</b> | <b>1.20</b> |

*\*Defined as a UTI occurring more than 14 days after another UTI*

Table S3. Sensitivity analysis of the number and incidence of resistant *E. coli* UTI per age- and sex category in the Netherlands in 2018

| Age category | Males            |                                         |                                         |                      |                                 | Females            |                                         |                                         |                      |                                 |
|--------------|------------------|-----------------------------------------|-----------------------------------------|----------------------|---------------------------------|--------------------|-----------------------------------------|-----------------------------------------|----------------------|---------------------------------|
|              | Male inhabitants | Number of resistant <i>E. coli</i> UTIs | Resistant <i>E. coli</i> UTIs incidence | Average              |                                 | Female inhabitants | Number of resistant <i>E. coli</i> UTIs | Resistant <i>E. coli</i> UTIs incidence | Average              |                                 |
|              |                  |                                         |                                         | Recurrent* resistant | resistant                       |                    |                                         |                                         | Recurrent* resistant | resistant                       |
|              |                  |                                         |                                         | <i>E. Coli</i> UTIs  | <i>E. coli</i> UTIs per patient |                    |                                         |                                         | <i>E. coli</i> UTIs  | <i>E. coli</i> UTIs per patient |
| 0            | 87001            | 12                                      | 0.000137929                             | 0                    | 1.00                            | 82565              | 10                                      | 0.000121117                             | 0                    | 1.00                            |
| 1-4          | 358019           | 21                                      | 5.86561E-05                             | 0                    | 1.00                            | 340514             | 111                                     | 0.000323041                             | 1                    | 1.01                            |
| 5-9          | 475503           | 10                                      | 2.10304E-05                             | 0                    | 1.00                            | 452563             | 137                                     | 0.000287253                             | 7                    | 1.05                            |
| 10-14        | 494511           | 8                                       | 1.61776E-05                             | 0                    | 1.00                            | 471948             | 58                                      | 0.000122895                             | 0                    | 1.00                            |
| 15-19        | 536852           | 16                                      | 2.79407E-05                             | 1                    | 1.07                            | 511180             | 54                                      | 0.000105638                             | 0                    | 1.00                            |
| 20-24        | 542817           | 16                                      | 2.76336E-05                             | 1                    | 1.07                            | 525964             | 121                                     | 0.000230054                             | 0                    | 1.00                            |
| 25-29        | 560319           | 32                                      | 5.53256E-05                             | 1                    | 1.03                            | 545838             | 155                                     | 0.000283967                             | 0                    | 1.00                            |
| 30-34        | 530554           | 35                                      | 6.59688E-05                             | 0                    | 1.00                            | 522235             | 132                                     | 0.000250845                             | 1                    | 1.01                            |
| 35-39        | 512925           | 19                                      | 3.70425E-05                             | 0                    | 1.00                            | 512431             | 107                                     | 0.000204906                             | 2                    | 1.02                            |

|              |                |             |                 |            |             |                |             |                 |            |             |
|--------------|----------------|-------------|-----------------|------------|-------------|----------------|-------------|-----------------|------------|-------------|
| 40-44        | 516723         | 38          | 6.77346E-05     | 3          | 1.09        | 521589         | 100         | 0.000191722     | 0          | 1.00        |
| 45-49        | 634188         | 75          | 0.000108801     | 6          | 1.09        | 634635         | 178         | 0.000272598     | 5          | 1.03        |
| 50-54        | 644223         | 118         | 0.000176957     | 4          | 1.04        | 635623         | 231         | 0.00035713      | 4          | 1.02        |
| 55-59        | 606130         | 169         | 0.000268919     | 6          | 1.04        | 605380         | 377         | 0.000597972     | 15         | 1.04        |
| 60-64        | 537540         | 227         | 0.000401831     | 11         | 1.05        | 542198         | 382         | 0.000671341     | 18         | 1.05        |
| 65-69        | 495875         | 368         | 0.000703806     | 19         | 1.05        | 503662         | 409         | 0.000770358     | 21         | 1.05        |
| 70-74        | 424486         | 488         | 0.001036548     | 48         | 1.11        | 447439         | 526         | 0.001115236     | 27         | 1.05        |
| 75-79        | 273902         | 477         | 0.001595461     | 40         | 1.09        | 314838         | 581         | 0.001715168     | 41         | 1.08        |
| 80-84        | 172825         | 379         | 0.002065673     | 22         | 1.06        | 235430         | 563         | 0.002229962     | 38         | 1.07        |
| ≥ 85         | 122648         | 400         | 0.003000457     | 32         | 1.09        | 248011         | 879         | 0.003306305     | 59         | 1.07        |
| <b>Total</b> | <b>8527041</b> | <b>2908</b> | <b>0.000341</b> | <b>194</b> | <b>1.07</b> | <b>8654043</b> | <b>5111</b> | <b>0.000591</b> | <b>239</b> | <b>1.05</b> |

*\*Defined as a UTI occurring more than 3 months after another UTI*
